# Supplementary material for: Comparative evaluation of long non-coding RNA-based biomarkers in the urinary sediment and urinary exosomes for non-invasive diagnosis of bladder cancer
Source: Royal Society of Chemistry journal article supplement (doi:10.1039/d2mo00107a), 2022-09-02
Supplement: d2mo00107a1.pdf [file d2mo00107a1.pdf]

## Raw data of western blotting

CD63

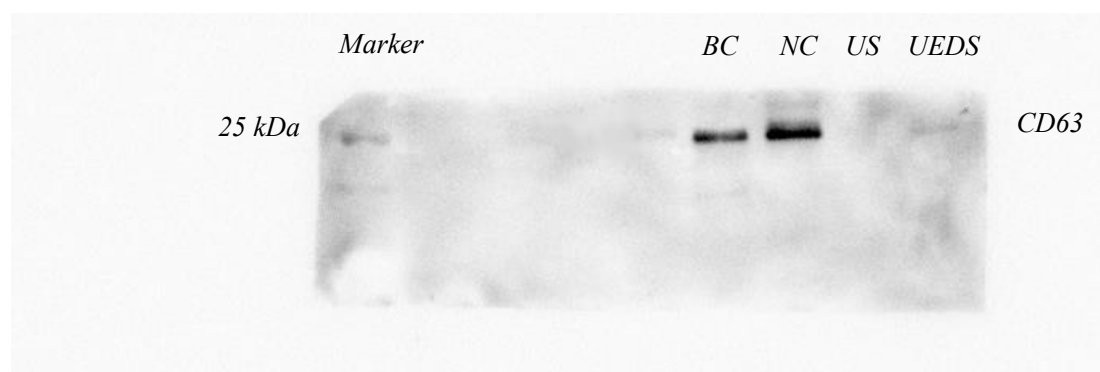

TSG101

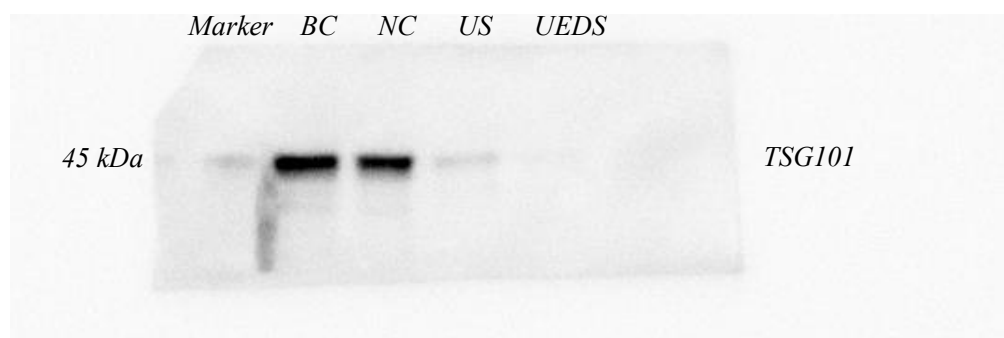

BC represents urinary exosomes of bladder cancer patients. NC represents urinary exosomes of normal controls. US represents urinary sediment, and UEDS represents urinary supernatant depleted urinary exosomes.
