# Supplementary material for: Comparative evaluation of long non-coding RNA-based biomarkers in the urinary sediment and urinary exosomes for non-invasive diagnosis of bladder cancer
Source: Royal Society of Chemistry journal article supplement (doi:10.1039/d2mo00107a), 2022-09-02
Supplement: d2mo00107a3.pdf [file d2mo00107a3.pdf]

**Table S2** General demographic and clinical data of the study population

|                   | Clinicopathological factors | BC group ( <i>n</i> = 22) | NC group ( <i>n</i> = 20) | <i>p</i> value     |
|-------------------|-----------------------------|---------------------------|---------------------------|--------------------|
| Training cohort   | Age                         | 62.00 ± 15                | 63.50 ± 10                | 0.801 <sup>a</sup> |
|                   | Gender                      | Male 20 (90.90%)          | Male 19 (95.00%)          | 1.000 <sup>b</sup> |
|                   |                             | Female 2 (9.10%)          | Female 1 (5.00%)          |                    |
|                   | Cigarette smokers           | 13 (59.09%)               | 8 (40%)                   | 0.217 <sup>c</sup> |
|                   | Tumor stage                 | NMIBC 19 (86.36%)         |                           |                    |
|                   |                             | MBIC 3 (13.64%)           |                           |                    |
|                   | Tumor grade                 | Low 15 (68.18%)           |                           |                    |
|                   |                             | High 7 (31.82%)           |                           |                    |
|                   | Clinicopathological factors | BC group ( <i>n</i> = 33) | NC group ( <i>n</i> = 23) | <i>p</i> value     |
| Validation cohort | Age                         | 65.00 ± 16                | 65.00 ± 11                | 0.927 <sup>a</sup> |
|                   | Gender                      | Male 28 (84.85%)          | Male 17 (73.91%)          | 0.331 <sup>b</sup> |
|                   |                             | Female 5 (15.15%)         | Female 6 (26.09%)         |                    |
|                   | Cigarette smokers           | 19 (57.58%)               | 10 (43.48%)               | 0.299 <sup>c</sup> |
|                   | Tumor stage                 | NMBIC 22 (66.67%)         |                           |                    |
|                   |                             | MBIC 11 (33.33%)          |                           |                    |
|                   | Tumor grade                 | Low 14 (42.42%)           |                           |                    |
|                   |                             | High 19 (57.58%)          |                           |                    |

The data are shown as median ± interquartile range, BC bladder cancer, NC normal controls, NMIBC non-muscle-invasive bladder cancer, MIBC muscle-invasive bladder cancer, a Mann-Whitney U test, b Fisher's exact test, c Chi-square test
