# Supplementary material for: Comparative evaluation of long non-coding RNA-based biomarkers in the urinary sediment and urinary exosomes for non-invasive diagnosis of bladder cancer
Source: Royal Society of Chemistry journal article supplement (doi:10.1039/d2mo00107a), 2022-09-02
Supplement: d2mo00107a4.pdf [file d2mo00107a4.pdf]

**Table S3** Performance evaluation of support vector machine models

|             | RMRP+UCA1+MALAT1 | RMRP        | UCA1        | MALAT1      |
|-------------|------------------|-------------|-------------|-------------|
| AUC         | 0.875            | 0.743       | 0.738       | 0.719       |
| 95% CI      | 0.799–0.942      | 0.637–0.839 | 0.633–0.832 | 0.614–0.826 |
| accuracy    | 0.816            | 0.724       | 0.734       | 0.724       |
| precision   | 0.846            | 0.764       | 0.791       | 0.721       |
| recall      | 0.800            | 0.709       | 0.691       | 0.800       |
| specificity | 0.814            | 0.721       | 0.767       | 0.604       |
| F1          | 0.822            | 0.735       | 0.737       | 0.759       |
